# Supplementary material
Source: publisher figshare collection journal article supplement (https://acs.figshare.com/ndownloader/files/12987959)
Supplement: Supplementary file 1 [file 12987959]

**Dopamine-Assisted Synthesis of MoS<sub>2</sub> Nanosheets on Carbon Nanotube for Improved  
Lithium and Sodium Storage Properties**

*Han Zhou, Ruifang Zhang, Shili Song, Chunhui Xiao, Guoxin Gao, Shujiang Ding\**

Department of Applied Chemistry, School of Science, MOE Key Laboratory for Nonequilibrium Synthesis and Modulation of Condensed Matter, State Key Laboratory for Mechanical Behaviour of Materials, State Key Laboratory of Electrical Insulation and Power Equipment, Xi'an Jiaotong University, Xi'an-710049, China

\* Corresponding author: dingsj@xjtu.edu.cn

**Experimental Section**

*1. Materials synthesis:*

1.1 Synthesis of polydopamine@CNTs (PDA@CNT).

The synthesis of PDA@CNT were according a previously reported method.<sup>[27]</sup> First, CNTs (50 mg) were washed with 50 mM tris(hydroxymethyl) aminomethane-chloride acid (Tris-HCl) buffer (pH = 8.5) and centrifuged for three times. Then the washed CNT (50 mg) were dispersed into 100 mL 50 mM Tris-HCl by sonication, then added with 200 mg DA. The mixture was strong stirred for 24 h at room temperature, and the product was collected by centrifugation, washed with Tris-HCl buffer, and followed by drying in vacuum at 60 °C overnight, respectively.

## 1.2 Synthesis of MoS<sub>2</sub>@CNT

In a typical synthesis of MoS<sub>2</sub>@CNT, PDA@CNT (50 mg) was dispersed into 10 mL ethanol and 25 mL deionized water by ultrasonication for 5 min. Then, 0.3 g sodium molybdate hexahydrate (Na<sub>2</sub>MoO<sub>4</sub>·6H<sub>2</sub>O) and 0.6 g thiourea was added with continuous stirring. The solution was transferred into a Teflon-lined stainless steel autoclave (50 mL) and reacted at 200 °C for 24 h. The autoclave was then cooled to room temperature. The black precipitate was collected by centrifugation, washed thoroughly with ethanol, and finally dried at 80 °C for 12 h. The as-prepared MoS<sub>2</sub>@PDA@CNT material was further treated at 500 °C in an atmosphere of H<sub>2</sub>-N<sub>2</sub> (5:95, Volume/Volume) for 3 h with a heating rate of 1 °C min<sup>-1</sup> to obtain MoS<sub>2</sub>@CNT.

## 2. Characterization

SEM was carried out using a JSM-7000F field-emission scanning electron microscopy (JEOL, Tokyo, Japan). TEM was performed by using a JEM-2100 transmission electron microscope (JEOL, Tokyo, Japan). Crystallographic information of the sample was collected using powder X-ray diffraction (XRD; SHIMADZU, Lab X XRD-6000). Thermogravimetric analysis (Perkin-Elmer TGA 7) was carried out under a flow of air with a temperature ramp of 10 °C/min from room temperature to 800 °C. The surface properties of the as-made samples were studied by X-ray photoelectron spectroscopy (XPS, Thermo Fisher Scientific ESCALAB Xi+).

## 3. Electrochemical Measurements

For electrochemical measurements, the working electrode was prepared by mixing 70 wt% of the active material ( $\text{MoS}_2\text{@CNT}$ ), 20 wt% of conducting agent (carbon black, super-P-Li), and

10 wt% of binder (polyvinylidene difluoride, PVDF, Aldrich). Then it was uniformly cast onto a Cu foil and vacuum dried at 60 °C overnight. The loading mass of the active materials was  $\sim 1.0 \text{ mg cm}^{-2}$ . The cells (CR 2016) were assembled in an Ar-filled glove box ( $\text{O}_2 \leq 0.3 \text{ ppm}$ ,  $\text{H}_2\text{O} \leq 0.1 \text{ ppm}$ ). Sodium (lithium for LIBs) serves as both the counter electrode and the reference electrode. For NIBs, the electrolyte is 1M  $\text{NaClO}_4$  in ethylene carbonate (EC) and diethyl carbonate (DEC) (1:1 v/v) with 5% fluoroethylene carbonate (FEC) additive. For LIBs, the electrolyte is 1.0 M  $\text{LiPF}_6$  in EC and DEC (1:1 v/v). Cyclic voltammetry was performed using an electrochemical workstation (CHI 660D). The charge–discharge tests were performed using a NEWARE battery tester.

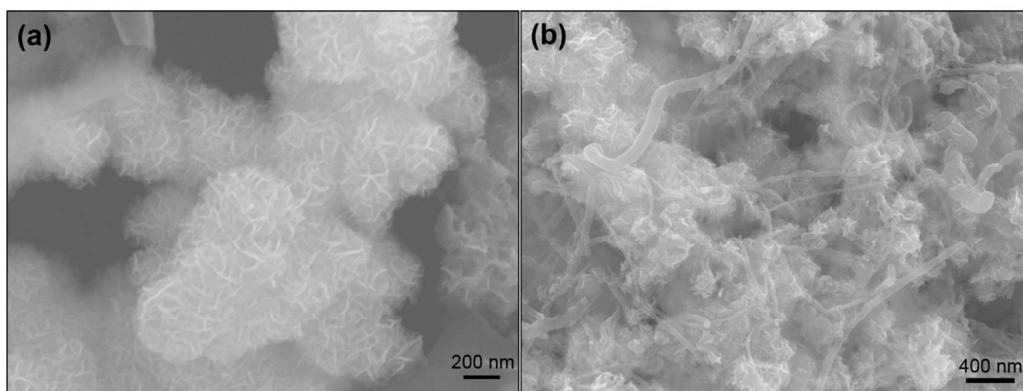

Figure S1. SEM images of a) pure  $\text{MoS}_2$ ; b)  $\text{MoS}_2@\text{CNT}$  synthesized with untreated CNTs.

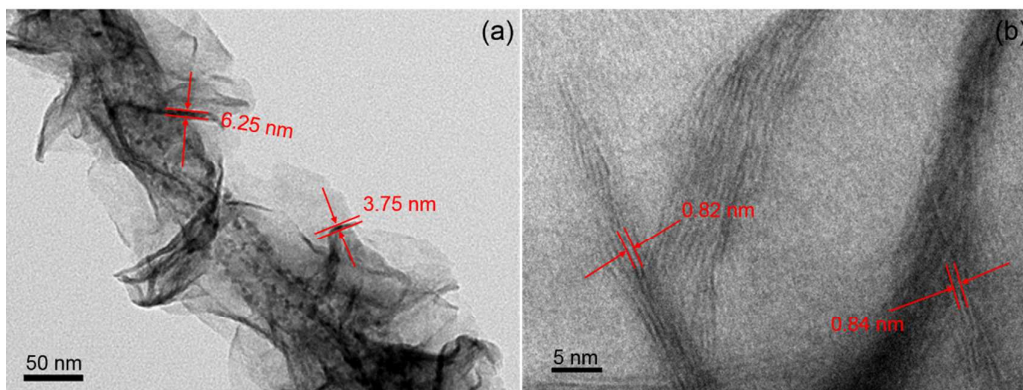

Figure S2 a) TEM image and b) HRTEM image of  $\text{Mo}_2@\text{CNT}$ .

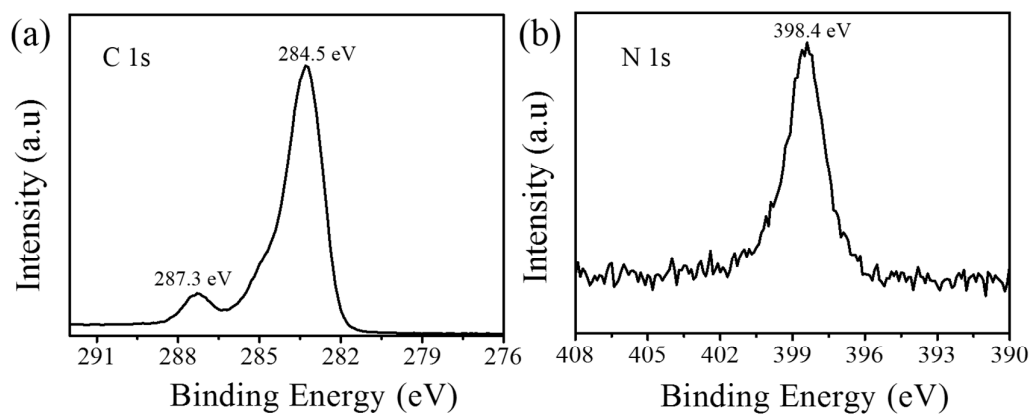

Figure S3. XPS patterns of a) C 1s and b) N 1s in MoS<sub>2</sub>@CNT.

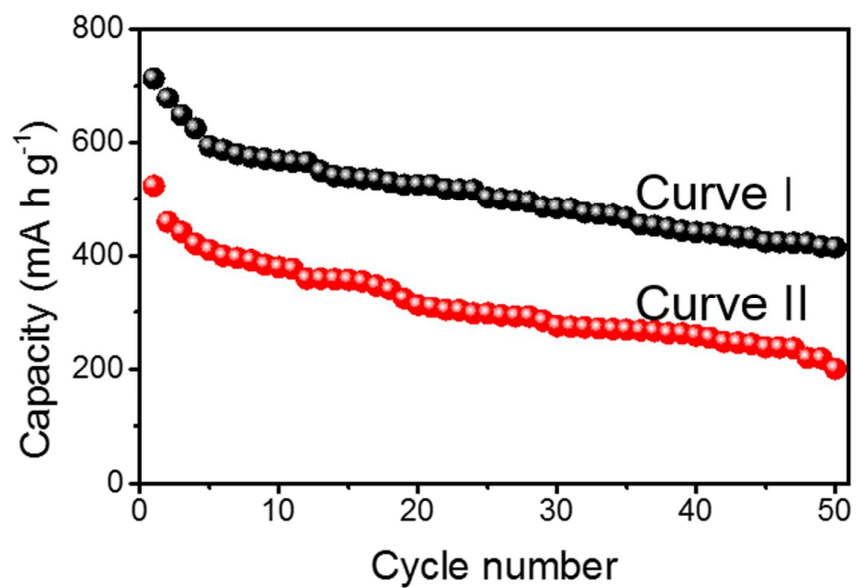

Figure S4 Cycling performance of MoS<sub>2</sub>@CNT without polydopamine at current density of 200 mA g<sup>-1</sup>. Curve I is the lithium ion storage property and Curve II is the sodium ion storage property.

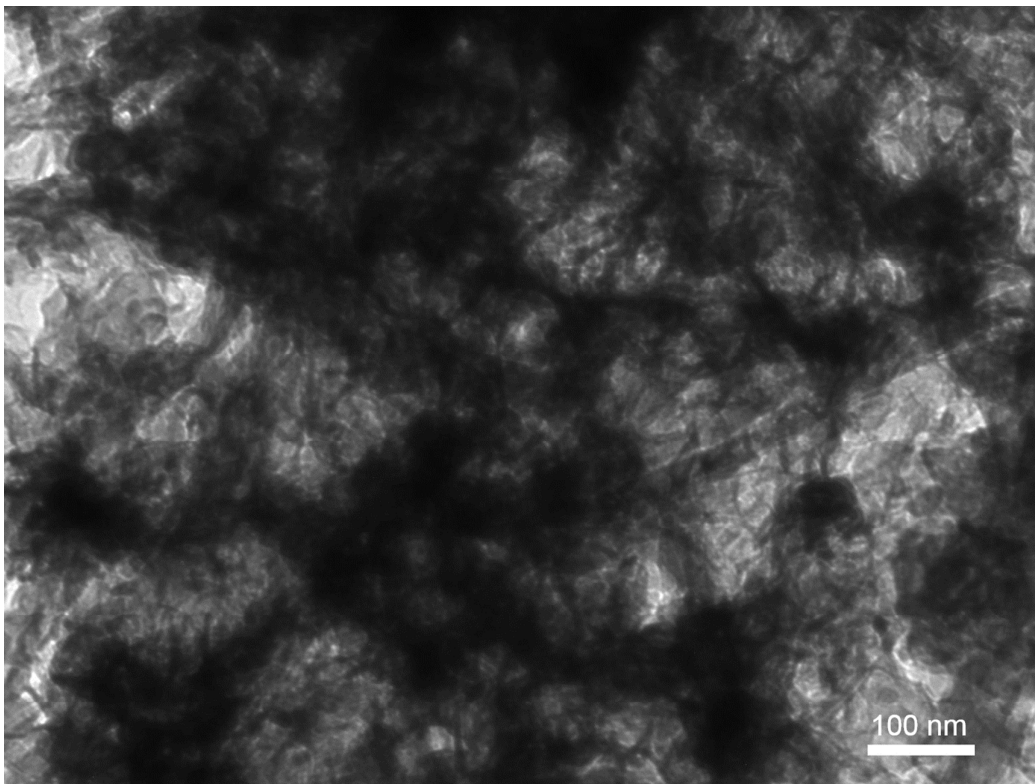

Figure S5 TEM images of MoS<sub>2</sub>@CNT after 30 cycles.

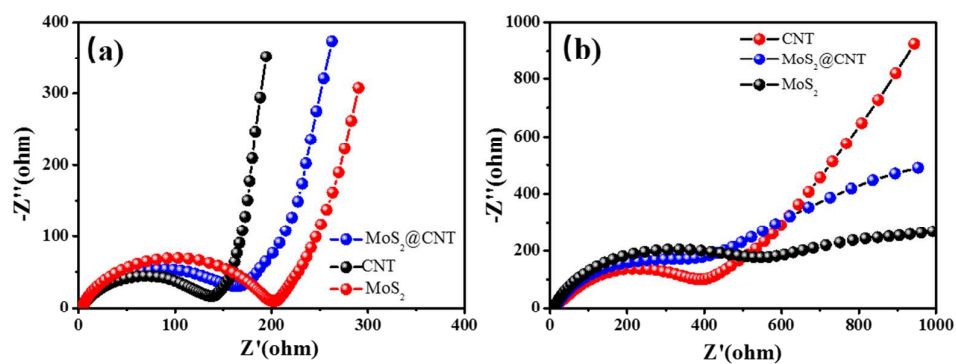

Figure S6. Nyquist plots of the MoS<sub>2</sub>@CNT, pure MoS<sub>2</sub> and CNT anode a) incipient state; b) after 5 cycles.

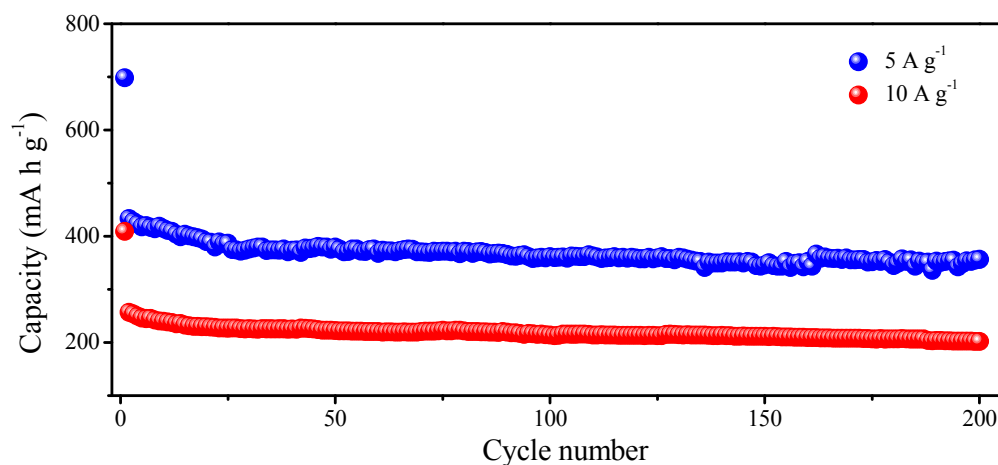

Figure S7 Cycling performance of MoS<sub>2</sub>@CNT at 5 current density of 5 A g<sup>-1</sup> and 10 A g<sup>-1</sup>.

Table S1 Comparison of sodium ion storage performance of this present work with previous works.

| Materials                       | Capacity (mAh g <sup>-1</sup> ) | Current density(mAg <sup>-1</sup> ) | Cycles | Ref.      |
|---------------------------------|---------------------------------|-------------------------------------|--------|-----------|
| MoS <sub>2</sub> @rGo           | 305                             | 100                                 | 50     | 1         |
| MoS <sub>2</sub> @C nanosheets  | 475                             | 200                                 | 200    | 2         |
| MoS <sub>2</sub> @graphene foam | 290                             | 100                                 | 50     | 3         |
| MoS <sub>2</sub> @Carbon Fiber  | 286                             | 80                                  | 100    | 4         |
| MoS <sub>2</sub> @C core shell  | 337                             | 100                                 | 300    | 5         |
| MoS <sub>2</sub> @CNT           | 420.5                           | 200                                 | 80     | 6         |
| MoS <sub>2</sub> @rGo           | 284                             | 1000                                | 160    | 7         |
| MoS <sub>2</sub> nanosheets     | 161                             | 20                                  | 100    | 8         |
| MoS <sub>2</sub> @rGo           | 339                             | 500                                 | 300    | 9         |
| MoS <sub>2</sub> @Go paper      | 218                             | 25                                  | 20     | 10        |
| MoS <sub>2</sub> @C network     | 443                             | 1000                                | 500    | 11        |
| MoS <sub>2</sub> @C             | 319                             | 1000                                | 1500   | 12        |
| MoS <sub>2</sub> @CNT           | 512.4                           | 200                                 | 100    | This work |

#### Reference

1. Qin, W.; Chen T.; Pan L.; Niu L; Hu B.; Li D.; Li J.; Sun Z. MoS<sub>2</sub>-reduced Graphene Oxide Composites via Microwave Assisted Synthesis for Sodium Ion Battery Anode with Improved Capacity and Cycling Performance. *Electrochim. Acta* **2015**, *153*, 55-61.
2. Shi Z.; Kang W.; Xu J.; Sun Y.; Jiang M.; Ng T.; Xue H.; Yu D.; Zhang W.; Lee C.

- Hierarchical Nanotubes Assembled from MoS<sub>2</sub>-carbon Monolayer Sandwiched Superstructure Nanosheets for High-Performance Sodium Ion Batteries. *Nano Energy* **2016**, *22*, 27-37.
3. Xiang J.; Dong D.; Wen F.; Zhao J.; Zhang X.; Wang L.; Liu Z. Microwave Synthesized Self-standing electrode ff MoS<sub>2</sub> Nanosheets Assembled on Graphene Foam for High-Performance Li-Ion and Na-Ion Batteries. *J. Alloy. Compd.* **2016**, *660*, 11-16.
  4. Xie X.; Taron M.; Zhao M.; K. L. Van Aken; Gogotsi Y.; Wang G. MoS<sub>2</sub> Nanosheets Vertically Aligned on Carbon Paper: A Freestanding Electrode for Highly Reversible Sodium-Ion Batteries. *Adv. Energy Mater.* **2016**, *6*, 1502161.
  5. Wang B.; Xia Y.; Wang G.; Zhou Y.; Wang H.; Core Shell MoS<sub>2</sub>/C Nanospheres Embedded in Foam-like Carbon Sheets Composite with an Interconnected Macroporous Structure as Stable and High-Capacity Anodes for Sodium Ion Batteries. *Chem. Eng. J.* **2017**, *309*, 417-425.
  6. Zhang S.; Yu X.; Yu H.; Chen J.; Gao P.; Li C.; Zhu C. Growth of Ultrathin MoS<sub>2</sub> Nanosheets with Expanded Spacing of (002) Plane on Carbon Nanotubes for High-Performance Sodium-Ion Battery Anodes. *ACS Appl. Mater. Inter.* **2014**, *6*, 21880-21885
  7. Che Z.; Li Y.; Chen K.; Wei M. Hierarchical MoS<sub>2</sub>@RGO Nanosheets for High Performance Sodium Storage. *J. Power Sources* **2016**, *331*, 50-57.
  8. Bang G.; Nam K.; Kim J.; Shin J.; Choi J.; Choi S. Effective Liquid-Phase Exfoliation and Sodium Ion Battery Application of MoS<sub>2</sub> Nanosheets. *ACS Appl. Mater. Inter.* **2014**, *6*, 7048-7089.
  9. Qin W.; Li Y.; Teng Y.; Qin T. Hydrogen Bond-Assisted Synthesis of MoS<sub>2</sub>/reduced Graphene Oxide Composite with Excellent Electrochemical Performances for Lithium and Sodium Storage. *J. Colloid. Interf. Sci.* **2018**, *512*, 826-833.
  10. David L.; Bhandvat R.; Singh G. MoS<sub>2</sub>/Graphene Composite Paper or Sodium-Ion Battery Electrodes. *ACS Nano*, **2014**, *8*, 1759-1770.
  11. Hu X.; Li Y.; Zeng G.; Jia J.; Zhan H.; Wen Z. Three-Dimensional Network Architecture with Hybrid Nanocarbon Composites Supporting Few-Layer MoS<sub>2</sub> for Lithium and Sodium storage. *ACS Nano*, **2018**, *12*, 1592-1602.
  12. Wang H.; Jiang H.; Saha P.; Cheng Q.; Li C. Interface-engineered MoS<sub>2</sub>/C Nanosheet Heterostructure Arrays for Ultra-Stable Sodium-Ion Batteries. *Chem. Eng. J.* **2017**, *174*, 104-111.
